# Supplementary material for: PES-Ag3PO4/g-C3N4 Mixed Matrix Film Photocatalyst for Degradation of Methyl Orange Dye
Source: MDPI journal article supplement (doi:10.3390/polym13111746), 2021-05-27
Supplement: s1 [file s1]

Supporting Information

## PES-Ag<sub>3</sub>PO<sub>4</sub>/g-C<sub>3</sub>N<sub>4</sub> Mixed Matrix Film Photocatalyst for Degradation of Methyl Orange Dye

Hayati Mohamad Mukhair<sup>1</sup>, Abdul Halim Abdullah<sup>1,2,\*</sup>, Zulkarnain Zainal<sup>1,2</sup> and Lim Hong Ngee<sup>1,2</sup>

The adsorption studies for PES and P-AgC with different Ag<sub>3</sub>PO<sub>4</sub>/g-C<sub>3</sub>N<sub>4</sub> loading were conducted under dark condition for 30 min. The percentage of adsorption was illustrated in Figure S1.

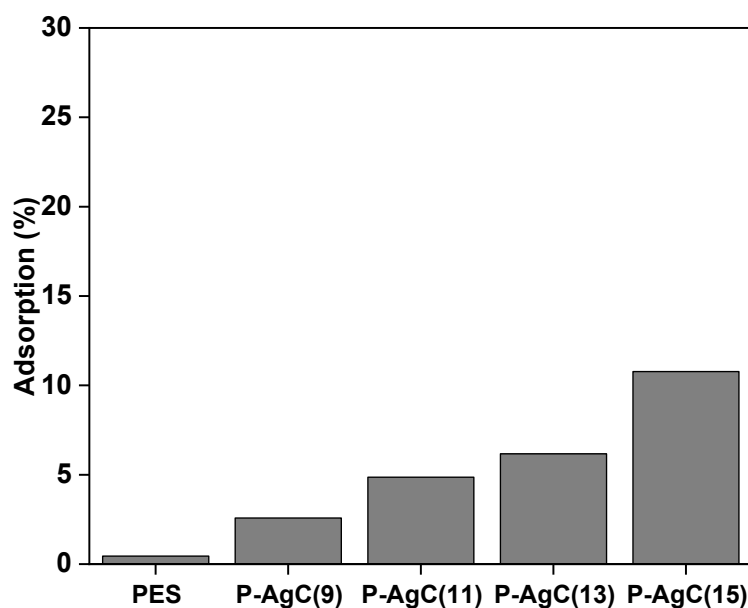

Figure S1. Percentage of MO adsorption by PES, P-AgC(9), P-AgC(11), P-AgC(13), and P-AgC(15).

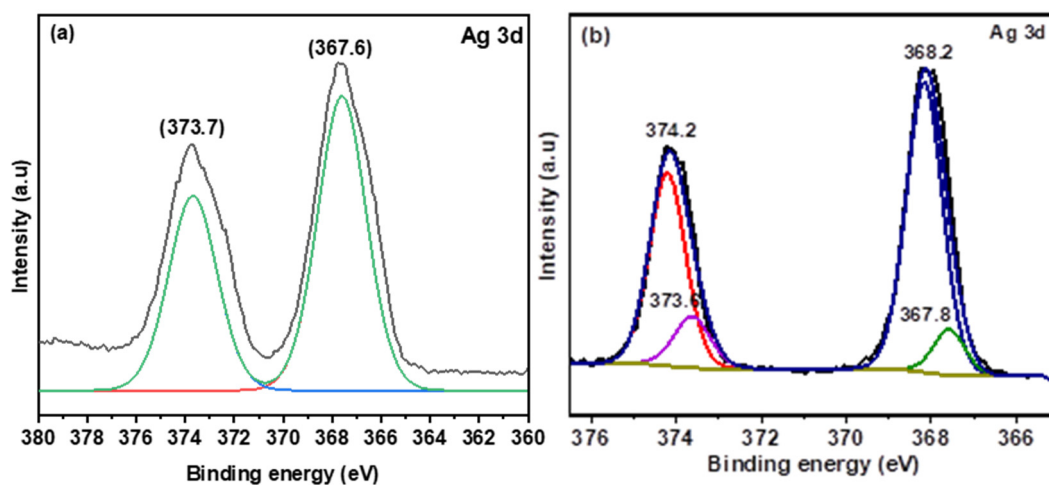

Figure S2. Binding energy of high resolution Ag 3d spectra of (a) P-AgC(13) before reaction and (b) P-AgC(13) after sixth cycles.
